# Supplementary material for: Enhancing Growth and Gut Health in Squabs: The Impact of Fermented Mixed Feed
Source: MDPI journal article supplement (doi:10.3390/ani14101411), 2024-05-08
Supplement: s1 [file s1]

**Journal name: Animals**

## **Enhancing Growth and Gut Health in Squabs: The Impact of Fermented Mixed Feed**

Changfeng Xiao <sup>a†</sup>, Xin Li <sup>a†</sup>, Zhizhao Ding <sup>a</sup>, Wenwei Lv <sup>a</sup>, Changsuo Yang <sup>a</sup>, Daqian He <sup>a</sup>, Lihui Zhu <sup>a\*</sup>

<sup>a</sup> *Institute of Animal Husbandry and Veterinary Science, Shanghai Academy of Agricultural Sciences, Shanghai 201106*

<sup>†</sup>These authors contributed equally to this work.

\*Corresponding author: Lihui Zhu. Email: zhulihui@saas.sh.cn. Address: Shanghai Academy of Agricultural Sciences; 2901 Beidi Road, Shanghai, China.

**Table S1 Chemical and anti-nutritional factor analysis of fermented mixed feed**

| Item                    | Un-fermented | Fermented |
|-------------------------|--------------|-----------|
| Crude protein (%)       | 38.13        | 41.8      |
| Crude fat (%)           | 3.71         | 5.00      |
| Crude fiber (%)         | 7.24         | 6.95      |
| Phytic acid (mg/g)      | 7.99         | 7.07      |
| Lactic acid, (mg/g)     | 6.18         | 23.46     |
| Glucosinolates (μmol/g) | 10.72        | 7.37      |

**Table S2 Composition and nutrition level of experimental diet (air dry basis)**

| Ingredients          | Content (%) |                     | Nutrient level <sup>1)</sup> | Content (%) |                     |
|----------------------|-------------|---------------------|------------------------------|-------------|---------------------|
|                      | Basal diet  | Basal diet + 5% FMF |                              | Content (%) | Basal diet + 5% FMF |
| <b>Raw Grain</b>     |             |                     | ME(MJ/kg)                    | 12.08       | 12.07               |
| Corn                 | 26.4        | 26.4                | Crude protein                | 15.41       | 15.42               |
| Soybean              | 19.8        | 14.8                | Calcium                      | 2.42        | 2.43                |
| Wheat                | 16.5        | 16.5                | Lysine                       | 0.73        | 0.72                |
| Sorghum              | 3.3         | 3.3                 | Methionine                   | 0.41        | 0.42                |
| <b>Pelleted feed</b> |             |                     |                              |             |                     |
| Corn                 | 10.88       | 10.88               |                              |             |                     |
| Soybean              | 4.08        | 4.08                |                              |             |                     |
| Wheat                | 1.02        | 1.02                |                              |             |                     |
| Soybean meal         | 11.22       | 11.22               |                              |             |                     |
| Wheat skin           | 0.51        | 0.51                |                              |             |                     |
| Wheat middlings      | 1.70        | 1.70                |                              |             |                     |
| Conch meal           | 0.34        | 0.34                |                              |             |                     |
| Limestone            | 0.34        | 0.34                |                              |             |                     |
| CaHPO <sub>4</sub>   | 0.34        | 0.34                |                              |             |                     |
| Soya-bean oil        | 3.40        | 3.40                |                              |             |                     |
| Nacl                 | 0.07        | 0.07                |                              |             |                     |
| Premix <sup>2)</sup> | 0.10        | 0.10                |                              |             |                     |
| <b>FMF</b>           | 0.00        | 5                   |                              |             |                     |
| <b>Total</b>         | 100         | 100                 |                              |             |                     |

<sup>1)</sup> The nutrient content was measured by the mixture of raw grain and pelleted feed except the ME. The experimental diets were formulated to contain similar levels of metabolic energy (ME) and crude protein (CP) to meet the nutritional needs of pigeons according to the NRC (Nutrient requirements of poultry. Washington, DC: The National Academies Press, 1994).

<sup>2)</sup> the premix provided the follows per kilogram of diet VA 3,200 KIU, VD3 800 KIU, VE 15IU, VK 16mg, VB1 8mg, VB2 24.8 mg, Calcium paththothenate 400 mg, niacin 32.5 mg, VB6 64mg, VB12 5mg, biotin 2mg, Fe 60 mg, Zn 66mg, Mn 65mg, Se 0.3 mg, I 1mg.

**Table S3 Primers used for real-time quantitative PCR**

| Primers           | F/R | 5'→3'                  | No.of genes    | Product (bp) |
|-------------------|-----|------------------------|----------------|--------------|
| <i>β-actin</i>    | F   | CCCATCTACGAAGGCTACGC   | XM_021291357.1 | 150          |
|                   | R   | CTTGATGTCACGCACAATTTC  |                |              |
| <i>IGF-1</i>      | F   | CCAATGGGCATTCTCCCAGT   | XM_005500280.3 | 181          |
|                   | R   | TAGGCTTTTGAGGGGCACAG   |                |              |
| <i>GHR</i>        | F   | ACCCAGGCTCTCAACAATGG   | NM_001282815.1 | 227          |
|                   | R   | CTGTTACGGCCAGACCACAT   |                |              |
| <i>Occludin-1</i> | F   | GCTTCTACCTGGTGGTGATTG  | XM_005509325.2 | 328          |
|                   | R   | TCCCAGTAGATGTTTTGTTTCC |                |              |
| <i>Claudin</i>    | F   | AGCCTCATCTCCACCATCTAT  | XM_021299640.1 | 325          |
|                   | R   | TGCCACTATTGTGATTTCAG   |                |              |
| <i>ZO-1</i>       | F   | GAACCAAAGCCAGTGTATG    | XM_021299314.1 | 247          |
|                   | R   | GGTCCCCTTCCTCTAATC     |                |              |

**Table S4 Comparison of microbial species abundance and diversity index of squabs**

| Items         | Control     | FMF        | P value |
|---------------|-------------|------------|---------|
| Sobs index    | 22.33±14.76 | 12.09±6.04 | 0.04    |
| Chao index    | 22.96±16.24 | 12.09±6.04 | 0.04    |
| Shannon index | 1.15±0.45   | 1.07±0.27  | 0.6     |
| Simpson index | 0.49±0.21   | 0.48±0.12  | 0.82    |
| Coverage      | >0.95       | >0.95      | —       |

**Table S5 Differentially expressed metabolites in squabs treated by fermented mixed feed**

| Metabolite                                                                                                                        | Formula     | Fold change<br>(Fermented/Control) | <i>P</i> _value | FDR  |
|-----------------------------------------------------------------------------------------------------------------------------------|-------------|------------------------------------|-----------------|------|
| Omega-Salicoyisalicin                                                                                                             | C20H22O9    | 2.55                               | 0.00            | 0.00 |
| 6-{3-[2,3-dioxo-3-(2,3,4,6-tetrahydroxyphenyl)propyl]-5-hydroxyphenoxy}-3,4,5-trihydroxyoxane-2-carboxylic acid                   | C21H20O14   | 1.86                               | 0.00            | 0.00 |
| Estrone-3,4-quinone                                                                                                               | C18H20O3    | 1.67                               | 0.00            | 0.01 |
| Methionyl-Arginine                                                                                                                | C11H23N5O3S | 1.67                               | 0.00            | 0.00 |
| 10-Acetoxyoleuropein                                                                                                              | C27H34O15   | 1.65                               | 0.00            | 0.00 |
| (2xi,4xi)-4,4',5,7-Tetrahydroxyflavan                                                                                             | C15H14O5    | 1.62                               | 0.00            | 0.01 |
| L-Dopa                                                                                                                            | C9H11NO4    | 1.60                               | 0.02            | 0.06 |
| 3-{[3,4-dihydroxy-5-(hydroxymethyl)oxolan-2-yl]oxy}-5,7-dihydroxy-2-(4-hydroxy-3-methoxyphenyl)-3,4-dihydro-2H-1-benzopyran-4-one | C21H22O11   | 1.60                               | 0.00            | 0.01 |
| Dopaquinone                                                                                                                       | C9H9NO4     | 1.59                               | 0.00            | 0.00 |
| 7-CHLOROETHYLTHEOPHYLLINE                                                                                                         | C9H11ClN4O2 | 1.56                               | 0.00            | 0.00 |
| Cymorcin diglucoside                                                                                                              | C22H34O12   | 1.55                               | 0.00            | 0.00 |
| 3,4,5-trihydroxy-6-[4-(5,7,8-trihydroxy-4-oxo-3,4-dihydro-2H-1-benzopyran-2-yl)phenoxy]oxane-2-carboxylic acid                    | C21H20O12   | 1.54                               | 0.00            | 0.00 |
| Gly Ile Gly Val                                                                                                                   | C15H28N4O5  | 0.67                               | 0.00            | 0.02 |
| 17-hydroxyandrostane-3-glucuronide                                                                                                | C25H40O9    | 0.66                               | 0.00            | 0.02 |
| 9'-Carboxy-gamma-chromanol                                                                                                        | C23H36O4    | 0.66                               | 0.00            | 0.00 |
| Val-Ala-OH                                                                                                                        | C13H16N2O6  | 0.66                               | 0.00            | 0.01 |
| O-Arachidonoyl Glycidol                                                                                                           | C23H36O3    | 0.66                               | 0.00            | 0.00 |

|                                                                                                                               |            |      |      |      |
|-------------------------------------------------------------------------------------------------------------------------------|------------|------|------|------|
| 2-(2,4-dihydroxy-5-methoxyphenyl)-3-(3,7-dimethylocta-2,6-dien-1-yl)-5,7-dihydroxy-6-(3-methylbut-2-en-1-yl)-4H-chromen-4-one | C31H36O7   | 0.66 | 0.04 | 0.11 |
| (3'x,5'a,9'x,10'b)-O-(3-Hydroxy-6-oxo-7-drimen-11-yl)umbelliferone                                                            | C24H28O5   | 0.65 | 0.00 | 0.01 |
| Glu Val Ile Glu                                                                                                               | C21H36N4O9 | 0.65 | 0.01 | 0.04 |
| 2-benzyl octan-1-ol                                                                                                           | C15H24O    | 0.65 | 0.01 | 0.04 |
| 2-(2,4-dihydroxyphenyl)-5,7-dihydroxy-3-(4-hydroxy-3,7-dimethylocta-2,6-dien-1-yl)-6-(3-methylbut-2-en-1-yl)-4H-chromen-4-one | C30H34O7   | 0.63 | 0.00 | 0.01 |
| 11'-Carboxy-gamma-tocotrienol                                                                                                 | C25H36O4   | 0.62 | 0.00 | 0.00 |
| 5,8,12-Trihydroxy-9-octadecenoic acid                                                                                         | C18H34O5   | 0.61 | 0.00 | 0.00 |
| PE(22:5/0:0)                                                                                                                  | C27H46NO7P | 0.60 | 0.00 | 0.00 |
| Val Leu His                                                                                                                   | C17H29N5O4 | 0.60 | 0.00 | 0.01 |
| 3,5-dihydroxy-2-[(2E)-3-(4-hydroxyphenyl)prop-2-enoyl]cyclohexa-2,5-diene-1,4-dione                                           | C15H10O6   | 0.58 | 0.00 | 0.01 |
| PE(16:1/0:0)                                                                                                                  | C21H42NO7P | 0.55 | 0.00 | 0.00 |
| LysoPE(22:6(4Z,7Z,10Z,13Z,16Z,19Z)/0:0)                                                                                       | C27H44NO7P | 0.54 | 0.00 | 0.00 |
| Estradiol-17-phenylpropionate                                                                                                 | C27H32O3   | 0.48 | 0.00 | 0.00 |
| Aminotriazole                                                                                                                 | C48H74O18  | 0.44 | 0.01 | 0.05 |
| 3-Benzoyloxy-6-oxo-12-ursen-28-oic acid                                                                                       | C37H50O5   | 0.39 | 0.00 | 0.01 |
| PE(22:6/0:0)                                                                                                                  | C27H44NO7P | 0.33 | 0.00 | 0.00 |
| 1-Arachidonoylglycerophosphoinositol                                                                                          | C29H49O12P | 0.30 | 0.00 | 0.02 |

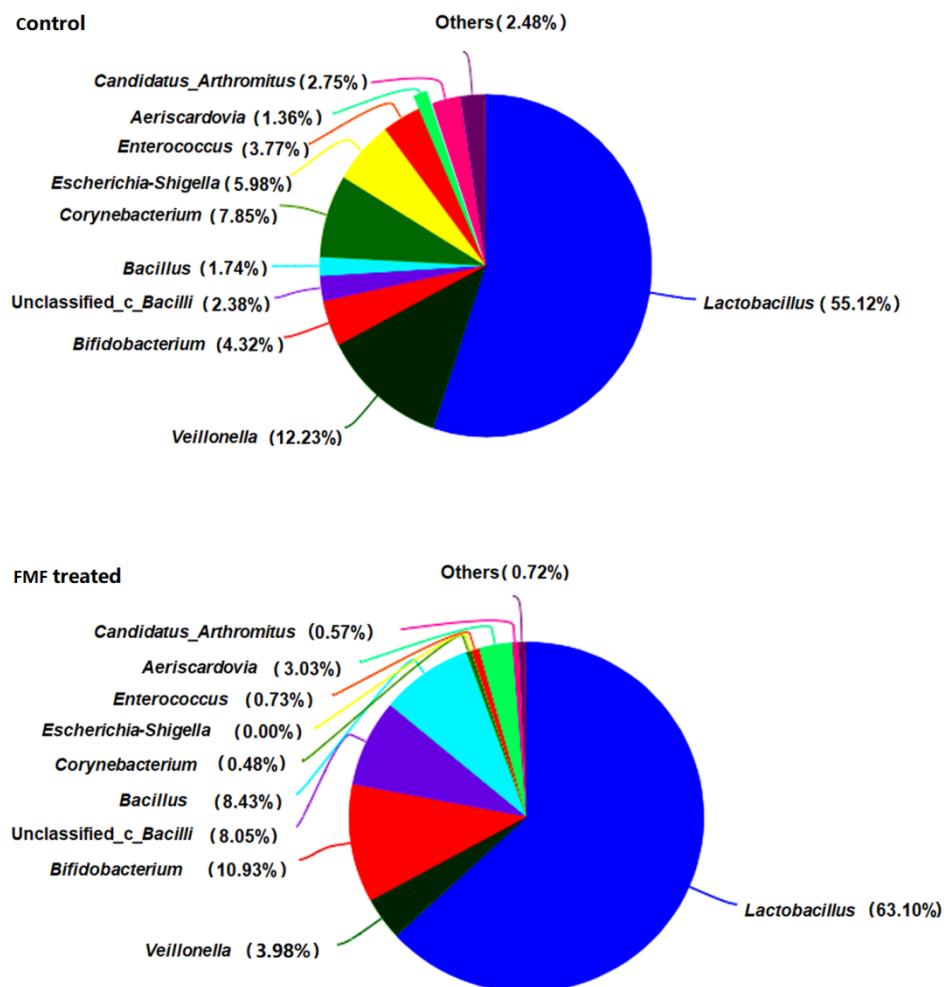

**Figure S1** Microbial relative abundance at the genus level for control and FMF groups

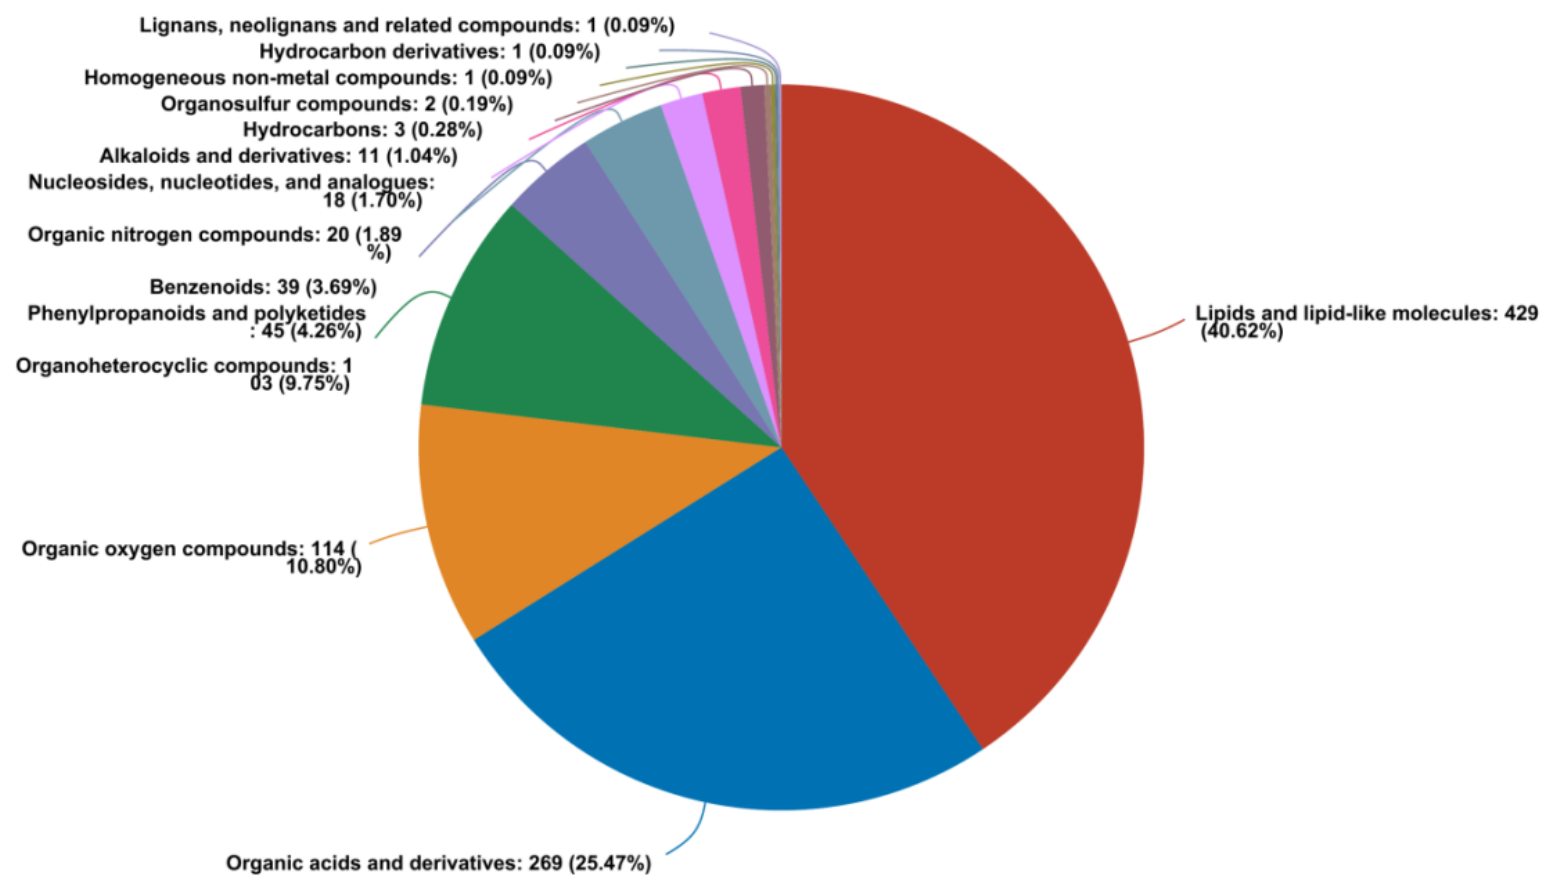

**Figure S2** Classification of metabolites
